# Supplementary material
Source: publisher figshare collection journal article supplement (https://karger.figshare.com/ndownloader/files/24193031)

**Supplementary Fig. S1.** Comparison of the frequency of LLR during VIT induction phase (% of conducted protocols) between the three protocols. LLR, large local reactions; VIT, venom immunotherapy.


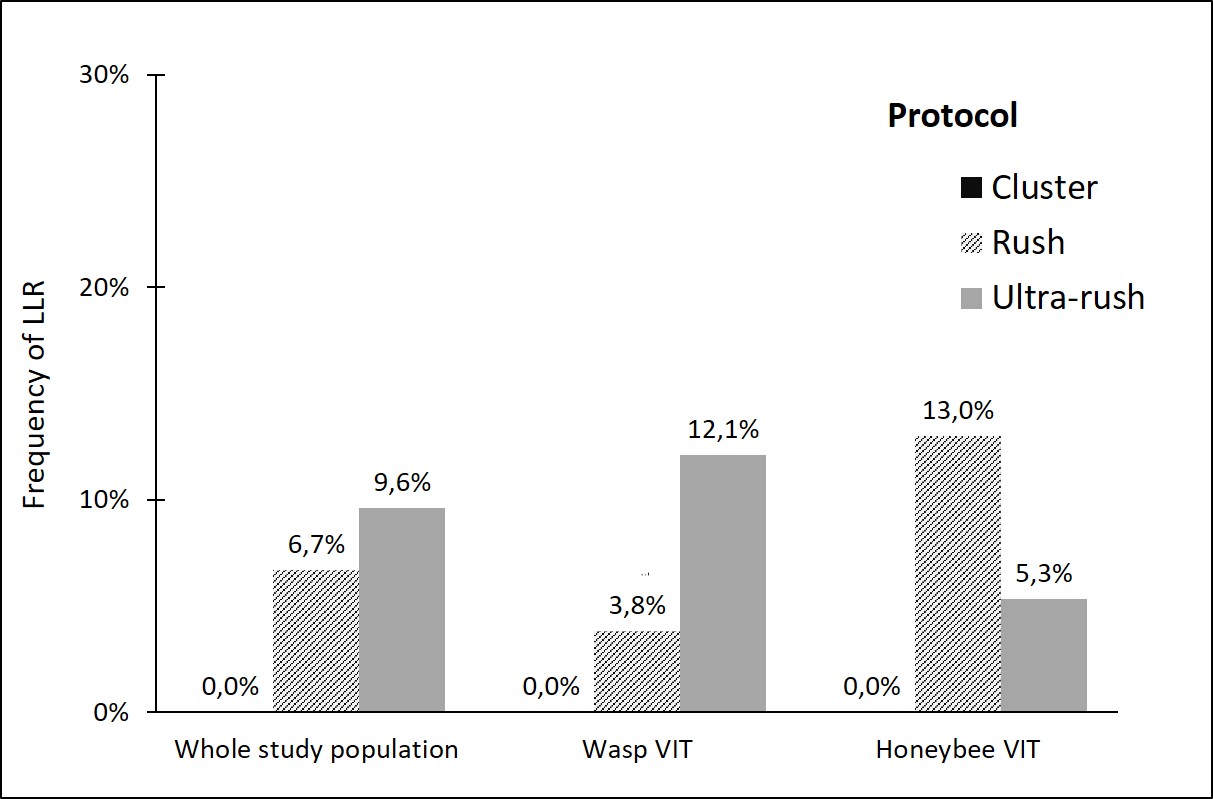

Supplement: Supplementary file 1 [file 24193031]
